# Supplementary material for: High-resolution profile of neoantigen-specific TCR activation links moderate stimulation to increased resilience of engineered TCR-T cells
Source: PubMed Central journal article supplement (PMC11615276; doi:10.1038/s41467-024-53911-0), 2024-12-03
Supplement: 41467_2024_53911_MOESM3_ESM.pdf [file 41467_2024_53911_MOESM3_ESM.pdf]

## Description of Additional Supplementary Files

**Supplementary Data 1.** Meta data of the single cell Seurat object, containing information about sample origin, number of features, cell state, clonotype, TCR and cluster distribution of each barcode.
